# Supplementary material for: Tuning the particle size, natural ferromagnetic resonance frequency and magnetic properties of ε-Fe2O3nanoparticles prepared by a rapid sol–gel method
Source: Royal Society of Chemistry journal article supplement (doi:10.1039/d1tc01242h), 2021-01-01
Supplement: d1tc01242h1.pdf [file d1tc01242h1.pdf]

## Supplementary Information

### §1. Rietveld analysis and electron diffraction

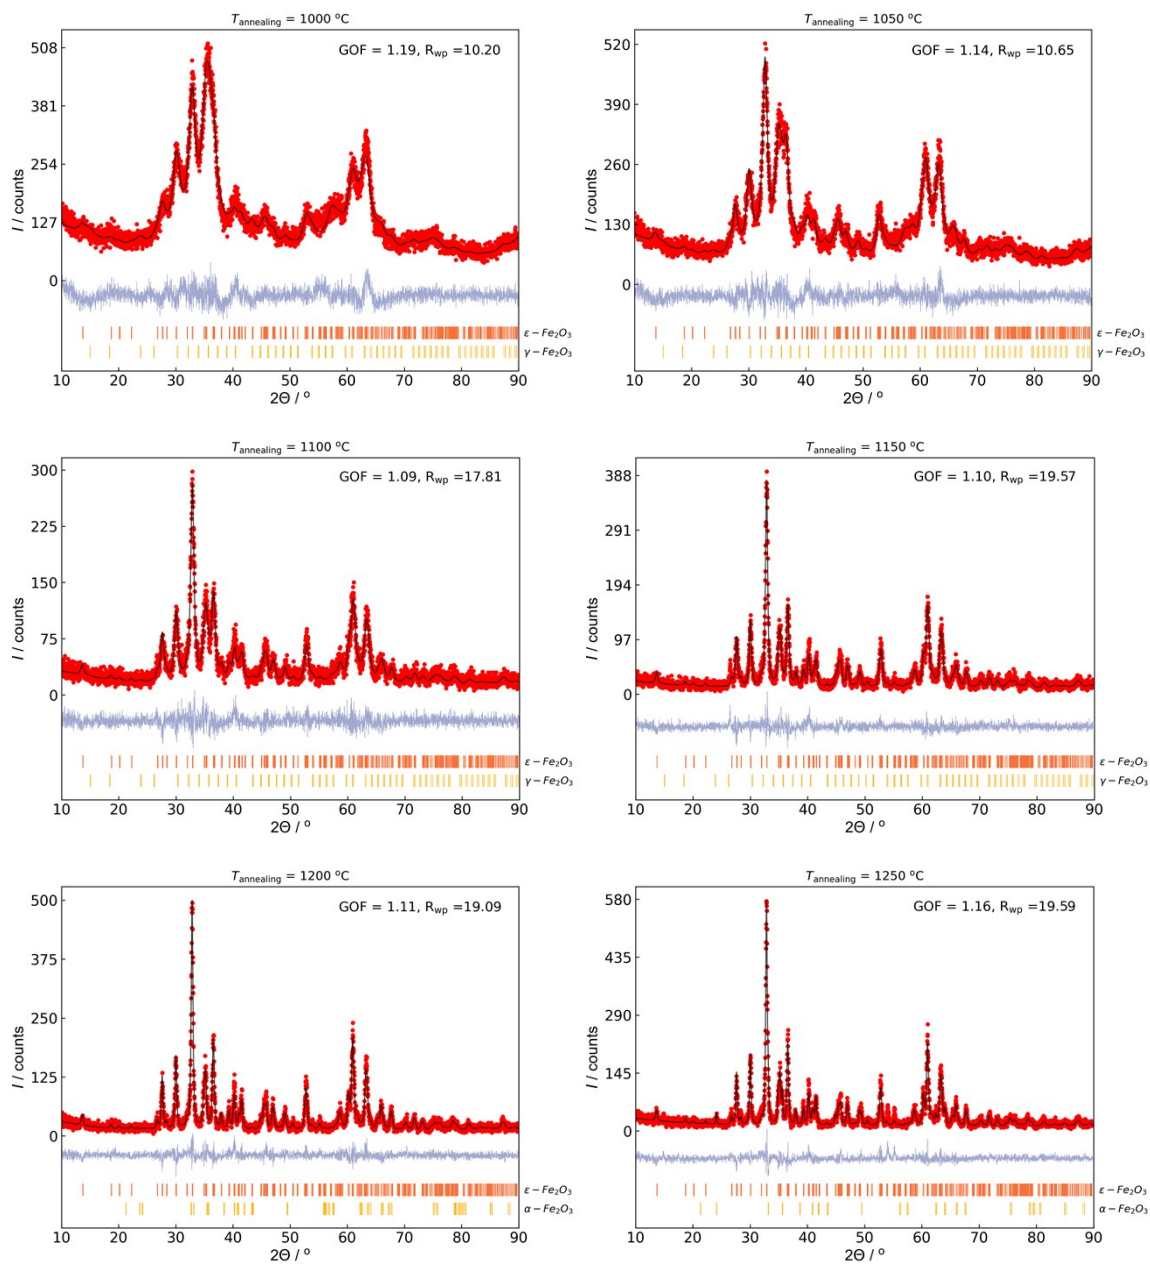

**Figure S1.** Full-profile analysis of the washed iron oxide samples obtained at various temperatures.

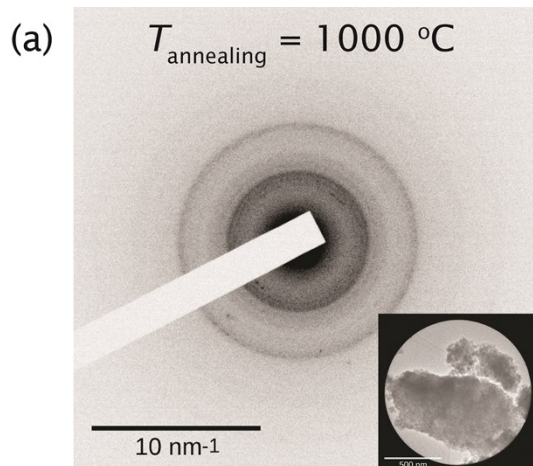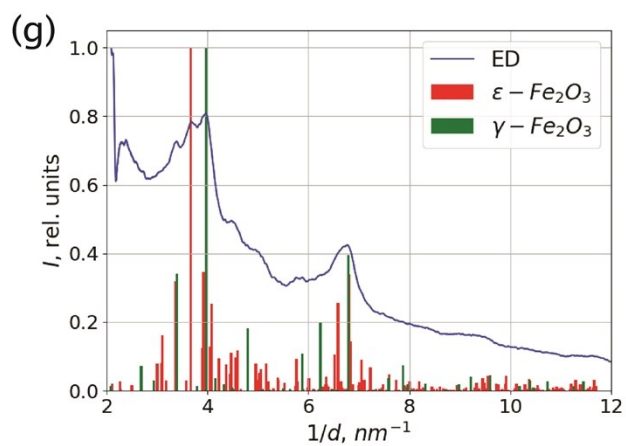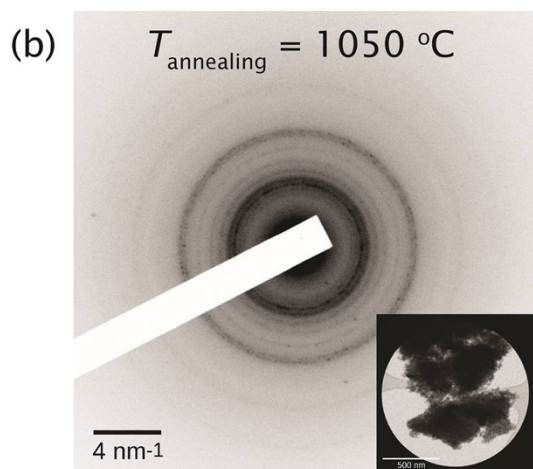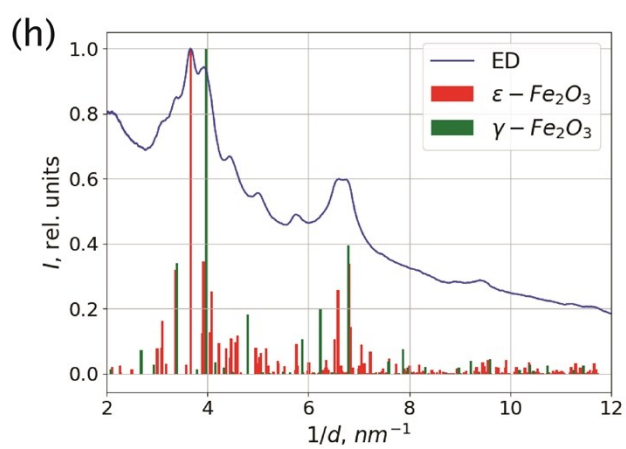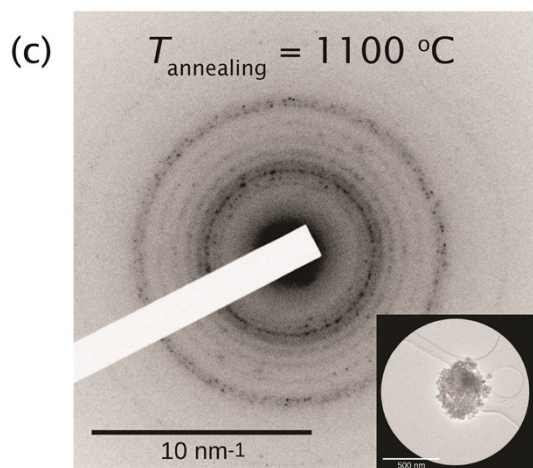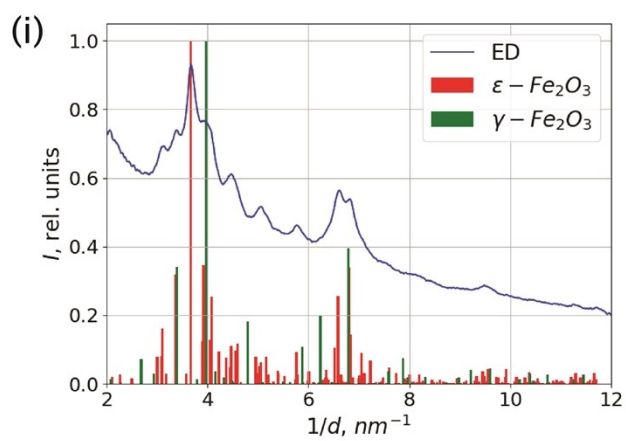

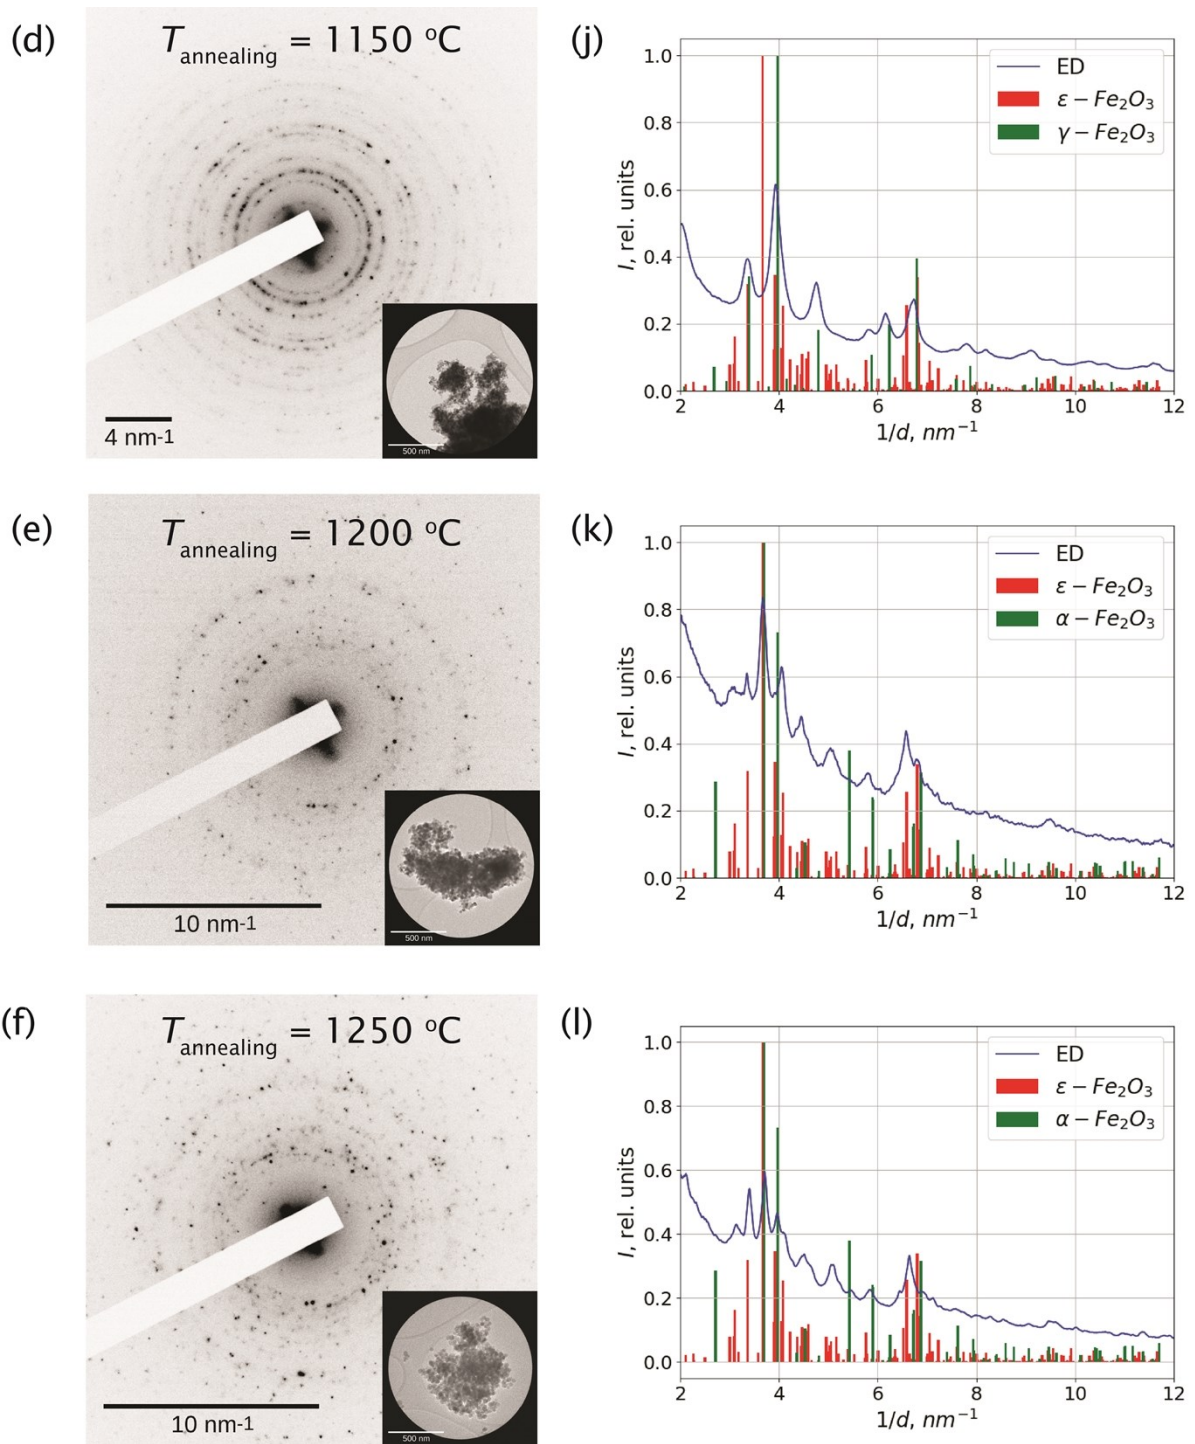

**Figure S2.** Electron diffraction patterns (a – f) and radial-integrated ones (g – l) of the washed iron oxide samples obtained at various temperatures.

## §2. FMR frequency modeling

According to the theory from ref. [I. S. Poperechny et al, *Phys. Rev. B*, 93(1), 014441, 2016] the frequency of ferromagnetic resonance for superparamagnetic particle can be expressed as:

$$Q_r = 1 - 2\varepsilon \frac{L_2(\xi_L)}{L_1(\xi_L)} P_2(\cos \psi),$$

where  $P_2$  is the second Legendre polynomial,  $L_1(x) = 1/\tanh x - 1/x$  and  $L_2(x) = 1 - 3L_1(x)/x$  are Langevin functions,  $\psi$  – easy axis tilt angle,  $\varepsilon = \frac{\gamma H_a}{2\omega} = \frac{\gamma H_a}{2\gamma H_a} = 1/2$ ,  $\xi_L = \frac{\mu\omega}{\gamma k_B T} = \frac{M_S V \gamma K_u}{M_S \gamma k_B T} = \frac{K_u V}{k_B T}$ , where  $\omega$  – FMR frequency,  $H_a$  – anisotropy field,  $\gamma$  – gyromagnetic ratio,  $T$  – temperature,  $k_B$  – Boltzmann constant,  $K_u$  – magnetic anisotropy constant,  $V$  – particle volume.

The resonance frequency for ensemble of randomly oriented magnetic particles we have determined as:

$$f_r = 0.5 \cdot (f_r(\psi = \pi/2) + f_r(\psi = 0)) = \frac{L_2\left(\frac{K_u V}{k_B T}\right)}{2L_1\left(\frac{K_u V}{k_B T}\right)} (P_2(\cos(\psi = 0)) + P_2(\cos(\psi = \pi/2)))$$

and the value, that is proportional to the linewidth as:

$$\Delta f_r = f_r(\psi = \pi/2) - f_r(\psi = 0) = \frac{L_2\left(\frac{K_u V}{k_B T}\right)}{L_1\left(\frac{K_u V}{k_B T}\right)} (P_2(\cos(\psi = 0)) - P_2(\cos(\psi = \pi/2))).$$

To calculate the  $f_r$  and the  $\Delta f_r$  for an ensemble of randomly oriented  $\varepsilon$ -Fe<sub>2</sub>O<sub>3</sub> particles the following parameters  $T = 300$  K,  $K_u = 7.7 \cdot 10^6$  erg/cm<sup>3</sup>,  $M_S = 15$  emu/g,  $d = 0 - 50$  nm<sup>3</sup>,  $k_B = 1.380649 \cdot 10^{-23}$  J/K were taken.

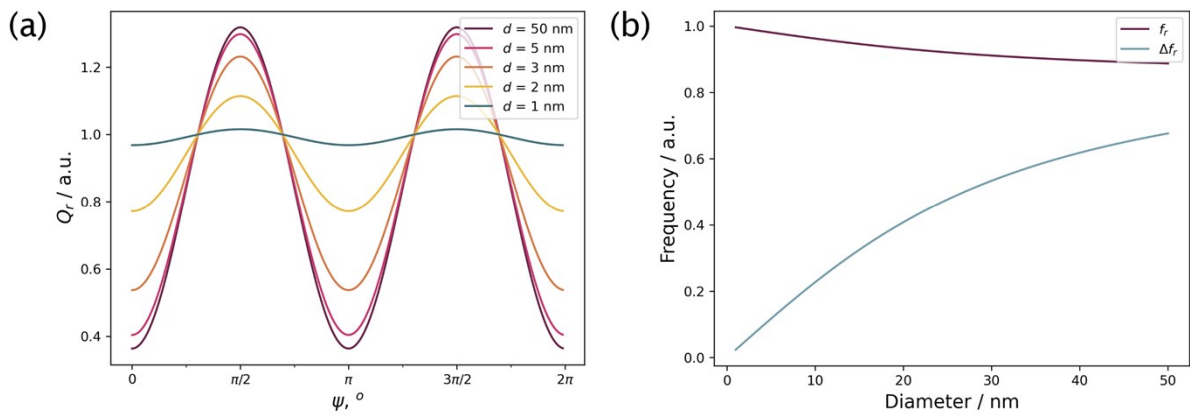

**Figure S3.** a)  $Q_r$  versus  $\psi$  for an epsilon oxide particle of various diameters; b) Ferromagnetic resonance frequency  $f_r$  and linewidth  $\Delta f_r$  ( $\gamma \sim \Delta f_r$ ) as functions of the particle diameters in an ensemble of randomly oriented spherical  $\varepsilon$ -Fe<sub>2</sub>O<sub>3</sub> particles with parameters:  $K_u = 7.7 \cdot 10^6$

erg/cm<sup>3</sup> [18],  $M_s = 15$  emu/g. Data was calculated using the theory from ref. [I. S. Poperechny et al, *Phys. Rev. B*, 93(1), 014441, 2016].
